# Supplementary material for: Novel Toscana Virus Reverse Genetics System Establishes NSs as an Antagonist of Type I Interferon Responses
Source: PubMed Central journal article supplement (PMC7232479; doi:10.3390/v12040400), 2020-04-04
Supplement: viruses-12-00400-s001.pdf [file viruses-12-00400-s001.pdf]

| Plasmid | TOSV genomic segment end   | Sequence (5' -> 3')                                                                                                                                                                                                                         |
|---------|----------------------------|---------------------------------------------------------------------------------------------------------------------------------------------------------------------------------------------------------------------------------------------|
| pUC57-L | T7 promotor – 3'UTR – ATG  | TAATACGACTCACTATAG <b>ACACAAAGAGGCCCAAATATG</b>                                                                                                                                                                                             |
|         | TAA – 5'UTR – HδV ribozyme | <b>TAACAAC</b> TTTGACACTTAGAGAACTAAGAAGGATAAAG<br>GGTTAGGGGGGTGTTCCTTTGTATTGTCTATAAATTATT<br><b>TAAGAATTGGGCGGTCTTTGTGTGGGT</b> CGGCATGGCATC<br>TCC                                                                                         |
| pCC1-M  | T7 promotor – 3'UTR – ATG  | TAATACGACTCACTATAG <b>ACACAAAGAAGGTGCTTATG</b>                                                                                                                                                                                              |
|         | TAA – 5'UTR – HδV ribozyme | <b>TAAAA</b> TAATCCATCTTCTTTCTATTATTCTCATGTATCT<br>TTCACCTCAGGGTTTAGGGGGGAGTGGGCAGTGCATGTG<br>TATGGCTCCGTTAGGCAGGTCTGAATCTCAGGGAAAGTA<br>TGGGAAGCAAAACAAGTTGATGGCAGTTTGGACATATTT<br>TGTTTTGTTCTTTAAAGCACCGGTCTTTGTGTGGGTCCG<br>CATGGCATCTCC |
| pUC57-S | T7 promotor – 3'UTR – ATG  | TAATACGACTCACTATAG <b>ACACAGAGATTCCCGTGTATT<br/>AATCAAAGCTATCAACATG</b>                                                                                                                                                                     |
|         | TAA – 5'UTR – HδV ribozyme | <b>CATGGCTGTCTAGAAGTCTATTATTAGTTCTGGTTTAGC<br/>GATACGGGAGGTCTTTGTGTGGGT</b> CGGCATGGCATCTCC                                                                                                                                                 |

Figure S1. Sequences of the 3' and 5' ends of the TOSV genomic segments, flanked by the T7 polymerase promoter (T7 promotor) and the HδV ribozyme respectively. T7 polymerase promoter and HδV ribozyme appear in black and TOSV genome sequences in blue. The authentic ATG (or CAT) start codons and the UAA stop codons appear in blue bold. UTR, untranslated terminal region.



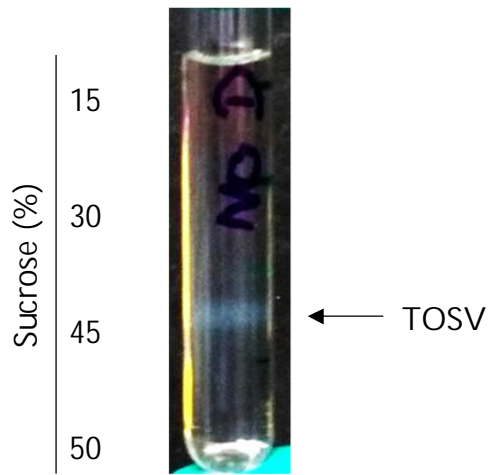

Figure S3. The picture shows a sucrose linear gradient after ultracentrifugation with a large white band that corresponds to TOSV.
